# Supplementary material for: The Long-Term Effect of Preterm Birth on Renal Function: A Meta-Analysis
Source: MDPI journal article supplement (doi:10.3390/ijerph18062951), 2021-03-13
Supplement: s1 [file s1]

**Table S1. Search strategy for PubMed and EMBASE**

**PubMed**

| No. | Query                                                                                                                                                                                                                                                                                                                                                                                                | Results |
|-----|------------------------------------------------------------------------------------------------------------------------------------------------------------------------------------------------------------------------------------------------------------------------------------------------------------------------------------------------------------------------------------------------------|---------|
| #1  | (((((infant, premature[MeSH Terms]) OR prematur*[Text Word]) OR pre-matur*[Text Word]) OR preterm[Text Word]) OR pre-term[Text Word])                                                                                                                                                                                                                                                                | 199910  |
| #2  | ((low birth weight[MeSH Terms]) OR “low birth weight infant*”[Text Word]) OR LBW[Text Word]                                                                                                                                                                                                                                                                                                          | 35377   |
| #3  | #1 OR #2                                                                                                                                                                                                                                                                                                                                                                                             | 217127  |
| #4  | ((((((((kidney NEXT/2 (function*[Text Word] OR failure*[Text Word] OR disease*[Text Word] OR insufficien*[Text Word])) OR (renal NEXT/2 (function*[Text Word] OR failure*[Text Word] OR disease*[Text Word] OR insufficien*[Text Word])) OR “glomerular filtration rate*”[Text Word]) OR hypertension[Text Word]) OR proteinuria[Text Word]) OR microalbuminuria[Text Word]) OR nephron*[Text Word]) | 438902  |
| #5  | #3 AND #4                                                                                                                                                                                                                                                                                                                                                                                            | 8913    |
| #6  | #5 AND Language [English]                                                                                                                                                                                                                                                                                                                                                                            | 8013    |

## EMBASE

| No. | Query                                                                      | Results |
|-----|----------------------------------------------------------------------------|---------|
| #1  | 'prematurity'/exp OR 'prematurity'                                         | 111950  |
| #2  | prematu*:ab,ti,kw                                                          | 184738  |
| #3  | ',pre-matur*':ab,ti,kw                                                     | 579     |
| #4  | preterm:ab,ti,kw                                                           | 91586   |
| #5  | 'pre-term':ab,ti,kw                                                        | 3881    |
| #6  | 'low birth weight':ab,ti,kw                                                | 32961   |
| #7  | 'LBW':ab,ti,kw                                                             | 4723    |
| #8  | #1 OR #2 OR #3 OR #4 OR #5 OR #6 OR #7                                     | 291471  |
| #9  | kidney NEXT/2 (function* OR failure* OR disease* OR insufficien*):ab,ti,kw | 135180  |
| #10 | renal NEXT/2 (function* OR failure* OR disease* OR insufficien*):ab,ti,kw  | 320594  |
| #11 | 'glomerular filtration rate':ab,ti,kw                                      | 55080   |
| #12 | hypertension:ab,ti,kw                                                      | 555152  |
| #13 | proteinuria:ab,ti,kw                                                       | 53665   |
| #14 | microalbuminuria:ab,ti,kw                                                  | 13100   |

|     |                                              |        |
|-----|----------------------------------------------|--------|
| #15 | nephron*:ab,ti,kw                            | 19764  |
| #16 | #9 OR #10 OR #11 OR #12 OR #13 OR #14 OR #15 | 960957 |
| #17 | #8 AND #16                                   | 17938  |
| #18 | #17 AND ([english]/lim)                      | 16375  |
