# Supplementary material for: The Long-Term Effect of Preterm Birth on Renal Function: A Meta-Analysis
Source: MDPI journal article supplement (doi:10.3390/ijerph18062951), 2021-03-13
Supplement: s1 [file s1]

**Table S3.** The Newcastle-Ottawa Scale (NOS) for case-control studies [20]

| Author, year           | Selection             |                       |                        | Comparability          |                     | Exposure          |                     |                      | Total |                      |
|------------------------|-----------------------|-----------------------|------------------------|------------------------|---------------------|-------------------|---------------------|----------------------|-------|----------------------|
|                        | Case def <sup>1</sup> | Case rep <sup>2</sup> | Cont. sel <sup>3</sup> | Cont. def <sup>4</sup> | 1-conf <sup>5</sup> | More <sup>6</sup> | Ascert <sup>7</sup> | Same mt <sup>8</sup> |       | NR Rate <sup>9</sup> |
| South, 2019 [8]        | 1                     | 1                     | 0                      | 1                      | 1                   | 0                 | 1                   | 1                    | 0     | 6                    |
| Vollsaeter, 2018 [24]  | 1                     | 1                     | 0                      | 1                      | 1                   | 1                 | 1                   | 1                    | 1     | 8                    |
| Paquette, 2018 [25]    | 1                     | 1                     | 1                      | 1                      | 1                   | 1                 | 1                   | 1                    | 1     | 9                    |
| Kowalski, 2018 [26]    | 1                     | 1                     | 0                      | 1                      | 1                   | 1                 | 1                   | 1                    | 0     | 7                    |
| Bonamy, 2017 [27]      | 1                     | 1                     | 0                      | 1                      | 1                   | 1                 | 1                   | 1                    | 0     | 7                    |
| Starzec, 2016 [28]     | 1                     | 1                     | 0                      | 1                      | 1                   | 0                 | 1                   | 1                    | 0     | 6                    |
| Gilarska, 2016 [29]    | 1                     | 1                     | 0                      | 1                      | 1                   | 0                 | 1                   | 1                    | 0     | 6                    |
| Washburn, 2015 [30]    | 1                     | 1                     | 0                      | 1                      | 1                   | 0                 | 1                   | 1                    | 0     | 6                    |
| Mathai, 2015 [31]      | 1                     | 1                     | 0                      | 1                      | 1                   | 1                 | 1                   | 1                    | 0     | 7                    |
| Lewandowski, 2015 [32] | 1                     | 1                     | 1                      | 1                      | 1                   | 1                 | 1                   | 1                    | 0     | 8                    |
| Juonala, 2015 [33]     | 1                     | 1                     | 0                      | 1                      | 1                   | 0                 | 1                   | 1                    | 0     | 6                    |

|                                 |   |   |   |   |   |   |   |   |   |   |
|---------------------------------|---|---|---|---|---|---|---|---|---|---|
| Gunay, 2014 [34]                | 1 | 0 | 0 | 1 | 1 | 1 | 1 | 1 | 0 | 6 |
| Bassareo, 2013 [35]             | 1 | 1 | 0 | 1 | 1 | 1 | 1 | 1 | 0 | 7 |
| Kwinta, 2011 [36]               | 1 | 1 | 0 | 1 | 1 | 0 | 1 | 1 | 0 | 6 |
| Lazdam, 2010 [37]               | 1 | 1 | 0 | 1 | 1 | 1 | 1 | 1 | 0 | 7 |
| Keijzer-Veen, 2010 [38]         | 1 | 1 | 0 | 1 | 1 | 0 | 1 | 1 | 0 | 6 |
| Hovi, 2010 [39]                 | 1 | 1 | 0 | 1 | 1 | 0 | 1 | 1 | 0 | 6 |
| Chan, 2010 [40]                 | 1 | 1 | 1 | 1 | 1 | 0 | 1 | 1 | 0 | 7 |
| Evensen, 2009 [41]              | 1 | 1 | 0 | 1 | 1 | 1 | 1 | 1 | 0 | 7 |
| Keijzer-Veen, 2007 [42]         | 1 | 1 | 1 | 1 | 1 | 0 | 1 | 1 | 0 | 7 |
| Bonamy, 2007 [43]               | 1 | 1 | 0 | 1 | 1 | 0 | 1 | 1 | 0 | 6 |
| Rodríguez-Soriano, 2005<br>[44] | 1 | 1 | 0 | 0 | 1 | 1 | 1 | 1 | 0 | 6 |
| Kistner, 2005 [45]              | 1 | 1 | 0 | 1 | 1 | 0 | 1 | 1 | 0 | 6 |
| Doyle, 2003 [46]                | 1 | 1 | 0 | 1 | 1 | 0 | 1 | 1 | 0 | 6 |

|                          |   |   |   |   |   |   |   |   |   |   |
|--------------------------|---|---|---|---|---|---|---|---|---|---|
| Kistner, 2000 [47]       | 1 | 1 | 0 | 1 | 1 | 0 | 1 | 1 | 0 | 6 |
| Siewert-Delle, 1998 [48] | 1 | 1 | 1 | 1 | 0 | 0 | 1 | 1 | 0 | 6 |
| Vanpée, 1992 [49]        | 1 | 0 | 0 | 1 | 1 | 0 | 1 | 1 | 0 | 5 |

<sup>1</sup>Case definition adequate?; <sup>2</sup>Representativeness of the cases; <sup>3</sup>Selection of controls; <sup>4</sup>Definition of controls; <sup>5</sup>Study control for most important confounder factor; <sup>6</sup>Study controls for additional factors; <sup>7</sup>Ascertainment of exposure; <sup>8</sup>Same method of ascertainment for cases and controls; <sup>9</sup>Non response rate.
